# Supplementary material
Source: MDPI journal article supplement (https://www.mdpi.com/2073-4344/12/9/995)
Supplement: s1 [file s1]

## **Supplementary Information for**

### **Superhydrophobic Ru catalyst for highly efficient hydrogenation of phenol under mild aqueous conditions**

**Shanshan Wang <sup>1</sup>, Jingliang Wang <sup>2</sup>, Xiaoxian Li <sup>1</sup>, Mingde Yang<sup>1</sup>, and Yulong Wu <sup>1,3\*</sup>**

<sup>1</sup> Institute of Nuclear and New Energy Technology, Tsinghua University, Beijing 100084

<sup>2</sup> College of Chemical Engineering, Xinjiang University, Xinjiang, 830046, China

<sup>3</sup> Key Laboratory of Advanced Reactor Engineering and Safety of Ministry of Education, Tsinghua University, Beijing, 100084, China

\* Correspondence: [wylong@tsinghua.edu.cn](mailto:wylong@tsinghua.edu.cn)

#### **Contents**

##### **1. Properties of catalysts**

##### **2. Catalytic performance of phenol hydrogenation**

## 1. Properties of catalysts

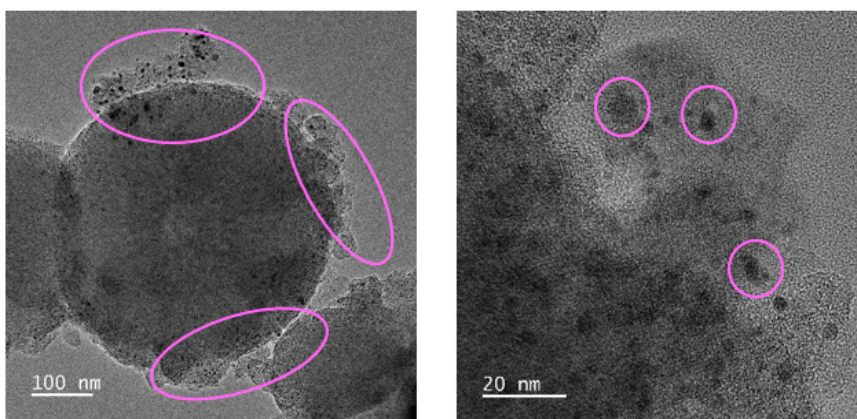

Figure S1. HRTEM image of Ru/N-CS

HRTEM image shows that the Ru nanoparticles in the Ru/N-CS were only detected on the external surface of the carbon spheres. The particles sizes were 3-6 nm. ICP reveals that the content of Ru in the catalyst was 0.16 wt%.

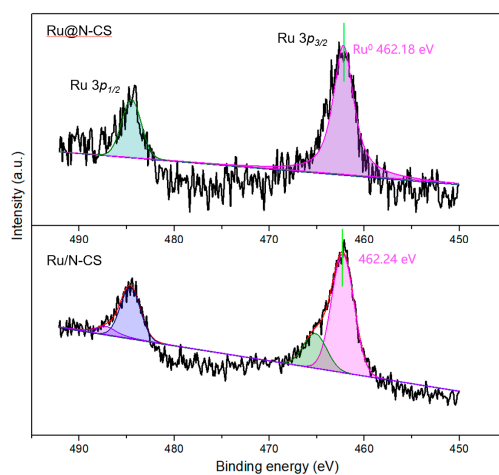

Figure S2. XPS spectra for Ru  $3p_{3/2}$  and Ru  $3p_{1/2}$  of Ru@N-CS and Ru/N-CS.

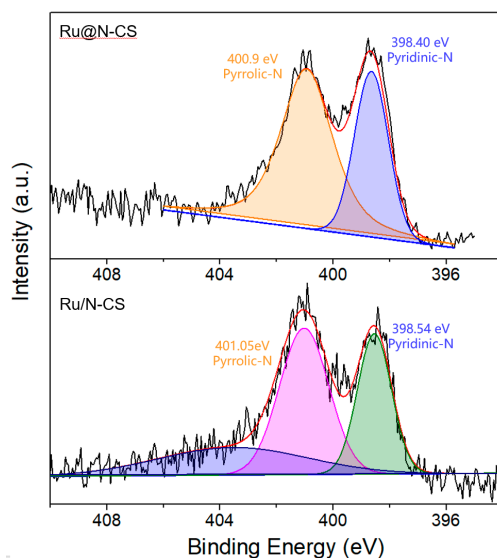

Figure S3. XPS spectra for N 1s of Ru@N-CS and Ru/N-CS.

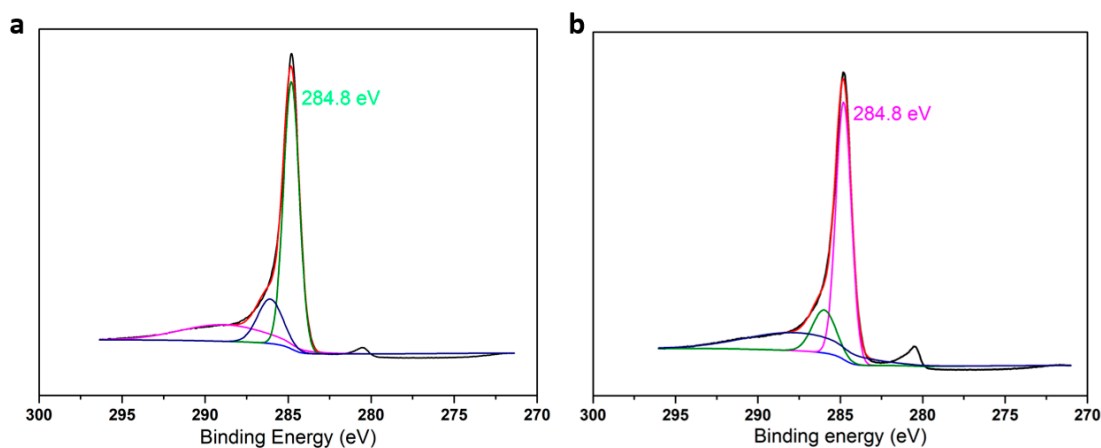

Figure S4. XPS spectra for C 1s of **a**, Ru@N-CS and **b**, Ru/N-CS

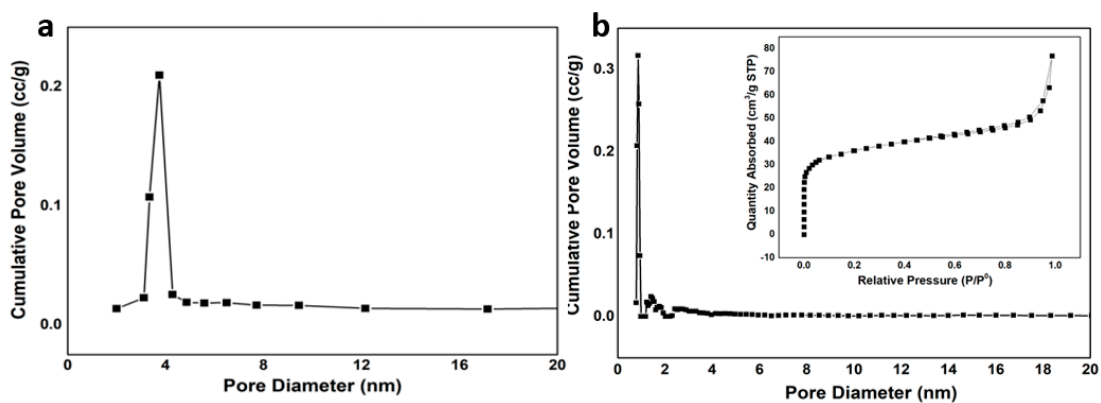

Figure S5. The pore size distribution by using the Barrett-Joyner-Halenda (BJH) method. **a**, for Ru@N-CS, **b**, for Ru/N-CS, the inset is nitrogen adsorption-desorption isotherms of Ru/N-CS.

## 2. Catalytic performance of phenol hydrogenation

The N-doped carbon spheres without Ru failed to catalyze the reaction. The peak that appeared at 2.2 minutes was dichloromethane extractant, and the peak that appeared at 9.4 minutes was phenol.

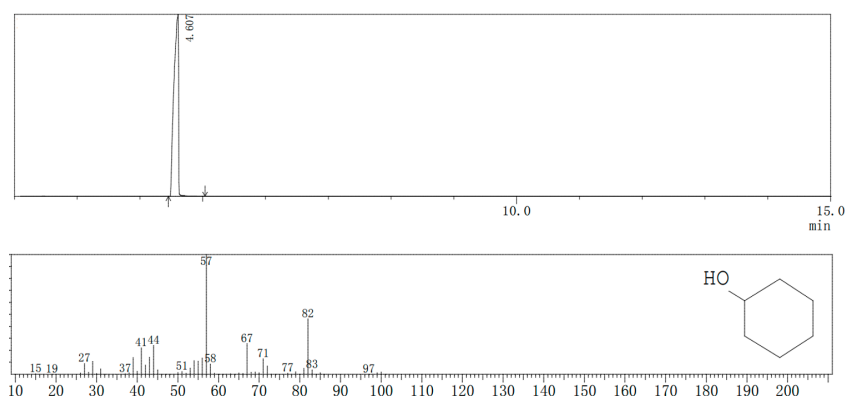

Figure S6. GC-MS for hydrogenation of phenol over Ru@N-CS. Experimental conditions: 0.11M of phenol, mass ratio of phenol and Ru was 13000:1, 80 °C, 0.5 MPa H<sub>2</sub>, 30 min, 800r.

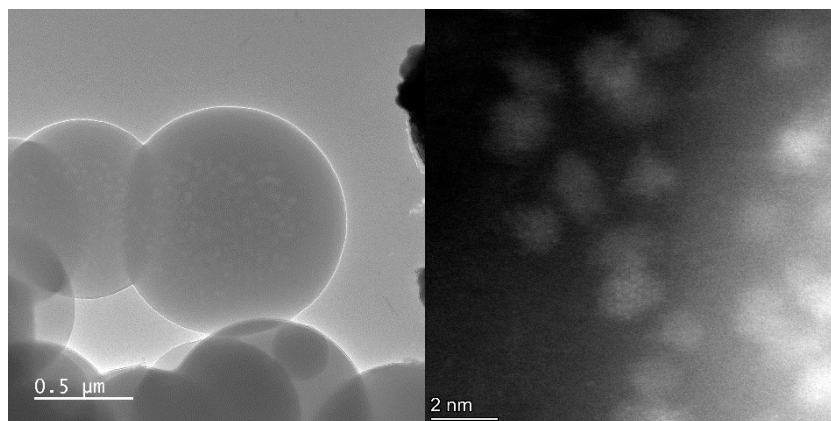

Figure S7. HRTEM and STEM image of Ru@N-CS after 8 cycles.

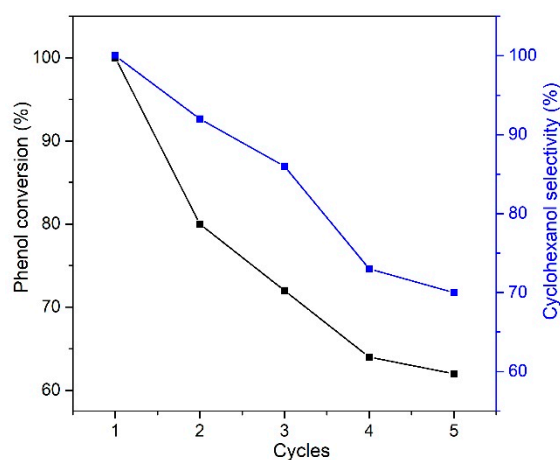

Figure S8. Reusability tests of phenol hydrogenation over Ru/N-CS catalyst under the following conditions: 0.11M of phenol, mass ratio of phenol and Ru was 1250:1, 80 °C, 0.5 MPa H<sub>2</sub>, 3h, 800 rpm.

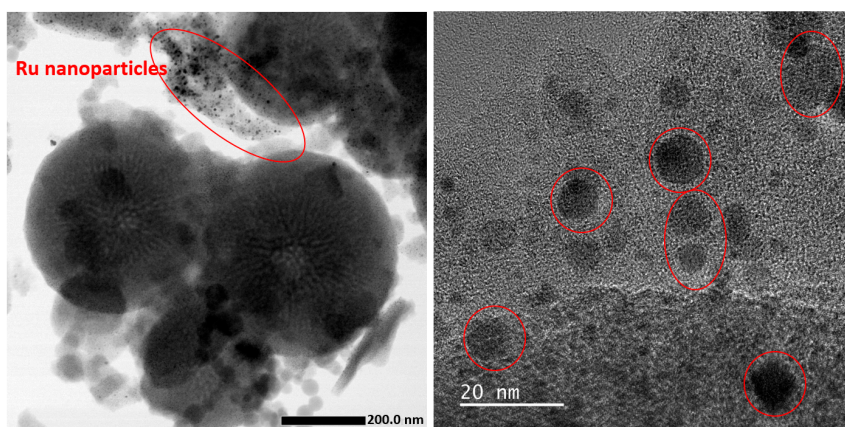

Figure S9. The HRTEM image of spend Ru/N-CS catalyst (5 cycles)

The HRTEM image (Figure S10) of spend catalyst (5 cycles) shows the structure of carbon spheres did not change, but Ru nanoparticles appeared agglomeration.

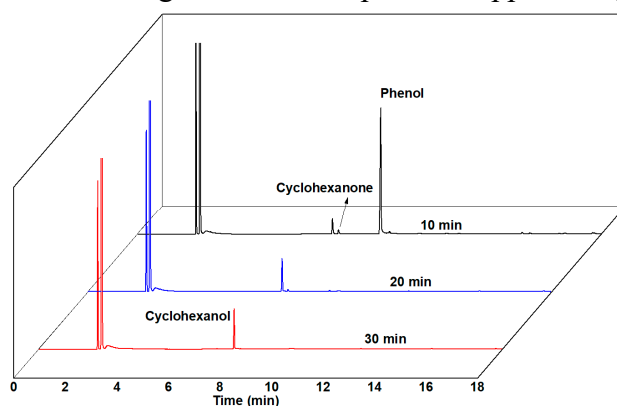

Figure S10. GC-MS for hydrogenation of phenol over Ru@N-CS at different times. Experimental conditions: 0.11M of phenol, mass ratio of phenol and Ru was 13000:1, 80 °C, 0.5 MPa H<sub>2</sub>, 10 mL H<sub>2</sub>O, 800 rpm.

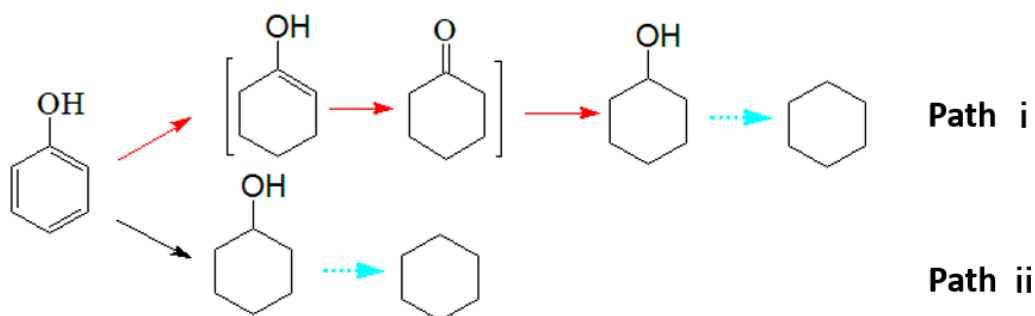

Figure S11. Possible reaction paths for phenol hydrogenation.

Table S1. Phenol conversion and cyclohexanol selectivity under different parameters over Ru@N-HC catalyst

|   | Mass ratio<br>(phenol:Ru) | $T$ (°C) | H <sub>2</sub> pressure<br>(MPa) | Time (min) | Conversion<br>(%) | Selectivity<br>(%) |
|---|---------------------------|----------|----------------------------------|------------|-------------------|--------------------|
| 1 | 6500:1                    | 80       | 0.5                              | 30         | 100               | 100                |
| 2 | 9750:1                    |          |                                  |            | 100               | 100                |
| 3 | 13000:                    |          |                                  |            | 100               | 100                |

|    |         |    |     |     |     |     |
|----|---------|----|-----|-----|-----|-----|
| 4  | 19500:1 |    |     |     | 48  |     |
| 5  |         |    | -   |     | 0   | 0   |
| 6  |         |    | 0.3 |     | 90  | 95  |
| 7  | 13000   | 80 | 0.5 | 30  | 100 | 100 |
| 8  |         |    | 1.0 |     | 100 | 100 |
| 9  |         |    | 2.0 |     | 100 | 100 |
| 10 |         |    |     | 10  | 11  | 90  |
| 11 |         |    |     | 20  | 90  | 95  |
| 13 | 13000   | 80 | 0.5 | 40  | 100 | 100 |
| 14 |         |    |     | 120 | 100 | 100 |
| 15 | 13000   | 60 | 0.5 | 30  | 96  | 98  |
| 16 |         | 70 |     |     | 99  | 99  |

Table S2. TOF and cyclic comparison over various catalysts for phenol conversion into cyclohexanol in an aqueous solution

|                                                 | $T$<br>(°C) | H <sub>2</sub><br>pressure<br>(MPa) | Time<br>(h) | phenol conv.<br>(%);<br>cyclohexanol<br>selec. (%) | TOF<br>(h <sup>-1</sup> ) | Cycles | Ref.                                     |
|-------------------------------------------------|-------------|-------------------------------------|-------------|----------------------------------------------------|---------------------------|--------|------------------------------------------|
| Carbon sphere                                   | 80          | 0.5                                 | 0.5         | 0; 0                                               | -                         | -      | This work                                |
| Ru@N-CS                                         | 80          | 0.5                                 | 0.5         | 100; 100                                           | 9880 <sup>a</sup>         | 7      | This work                                |
| Ru/N-CS                                         | 80          | 0.5                                 | 0.5         | 10; 90                                             | 689 <sup>b</sup>          | 5      | This work                                |
| Ru/N-doped<br>carbon                            | 40          | 0.5                                 | 2           | 95; 99                                             | 40                        | 5      | Nat.<br>Commun. 7<br>11326 2016          |
| Ru/G-CS                                         | 20          | 1                                   | 1           | 100; 100                                           | 20 <sup>c</sup>           | 10     | J. Mater.<br>Chem. A 4<br>5842 2016      |
| Ru/SiCN                                         | 50          | 0.3                                 | 24          | 100; 99                                            | 165 <sup>d</sup>          | 3      | Nat.<br>Commun. 9<br>1751, 2018          |
| Ru@NHC<br>ligands                               | r.t.        | 0.5                                 | 20          | 100; 100                                           | 1 <sup>e</sup>            | 4      | Chem.<br>Commun.,<br>54, 7070,<br>2018   |
| Ru/Nb <sub>2</sub> O <sub>5</sub> -<br>100C18PA | 80          | 1.2                                 | 4           | 100; 93                                            | 27 <sup>f</sup>           | 5      | Green<br>Chem., 24,<br>1152, 2022        |
| Rh/N-doped<br>carbon                            | 30          | 0.5                                 | 6           | 100; 100                                           | 49 <sup>g</sup>           | 5      | Green Chem.<br>22 3069,<br>2020          |
| Rh/hollow<br>mesoporous<br>silica               | 45          | 0.5                                 | 3           | 90.6; 96.6                                         | 946 <sup>h</sup>          | -      | Chem. Eng.<br>J. 397,<br>125484,<br>2020 |
| Pt/CeO <sub>2</sub>                             | 100         | 3                                   | 1.5         | 100; 94.6                                          | 650 <sup>i</sup>          | 5      | J. Mater.<br>Chem. A 2<br>18398, 2014    |

TOF was calculated on the basis of molar amount of Ru active metal on the catalyst surface with

<sup>a</sup> conversion of 10% in 10 min.

<sup>b</sup> conversion of 11% in 30 min.

$$\text{TOF} = \frac{\text{Mole of phenol conversion}}{\text{Mole number of active metal on the surface} \times \text{reaction time [h]}}$$

TOF was calculated on the basis of molar amount of Ru with

<sup>c</sup> conversion of 100% in 1.0 h.

<sup>d</sup> conversion of 80% in 5 h.

<sup>e</sup> conversion of 100% in 20 h, THF medium.

<sup>f</sup> conversion of 100% in 4 h decalin/water mixture medium.

<sup>g</sup> conversion of 100% in 6 h.

<sup>h</sup> conversion of 100% in 3 h.

<sup>i</sup> conversion of 100% in 1.5 h.

TOF was calculated using the following equation.

$$\text{TOF} = \frac{\text{Mole of phenol conversion}}{\text{Mole number of total Ru active metal} \times \text{reaction time [h]}}$$

**Table S3.** Table S3 The content of different types of nitrogen and Ru in two catalysts

| Samples | Relative elemental percentage (%) |        |        |                 |                  | Binding energy (eV) |        |        |                 |                  |
|---------|-----------------------------------|--------|--------|-----------------|------------------|---------------------|--------|--------|-----------------|------------------|
|         | Pyri-N                            | Pyrr-N | Oxid-N | Ru <sup>0</sup> | Ru <sup>4+</sup> | Pyri-N              | Pyrr-N | Oxid-N | Ru <sup>0</sup> | Ru <sup>4+</sup> |
| Ru@N-CS | 39.7%                             | 60.3%  | -      | ~100            | 0                | 398.40              | 400.9  | -      | 462.18          | -                |
| Ru/N-CS | 28.6%                             | 45.1%  | 26%    | 72              | 28               | 398.54              | 401.05 | 403.6  | 462.24          | 464.02           |

Note: Pyri-N, Pyrr-N, and Oxid-N represented pyridinic N, pyrrolic N, and Oxidic N, respectively.

**Table S4.** Reaction apparent activation energies ( $E_a$ ) for phebol conversion into cyclohexanol over various catalysts

| Catalysts                                           | $E_a$ (kJ mol <sup>-1</sup> ) | Refs.     |
|-----------------------------------------------------|-------------------------------|-----------|
| Ru@N-CS                                             | 33.8                          | This work |
| Ru/C-SBA-15                                         | 42.09                         | 28        |
| Ni <sub>3</sub> Co <sub>1</sub> @C/ZrO <sub>2</sub> | 44.31                         | 31        |
| Ni/HZSM-5                                           | 48                            | 29        |
| Ni/Al <sub>2</sub> O <sub>3</sub> -HZSM-5           | 56                            | 29        |
| 1% Pd/ZrO <sub>2</sub>                              | 81                            | 30        |
| 1% PdAg/ZrO <sub>2</sub>                            | 57                            | 30        |

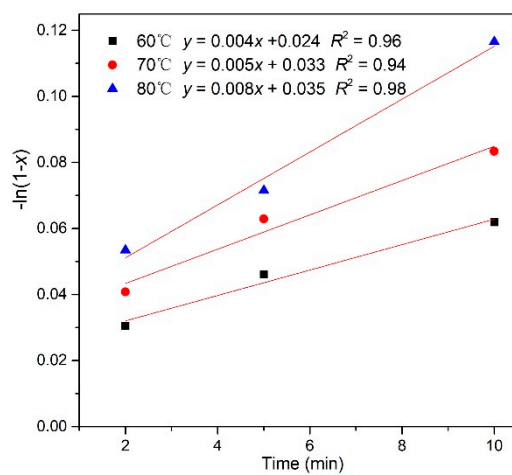

Figure S12. Kinetics study for plots of  $-\ln(1-x)$  vs. reaction time.

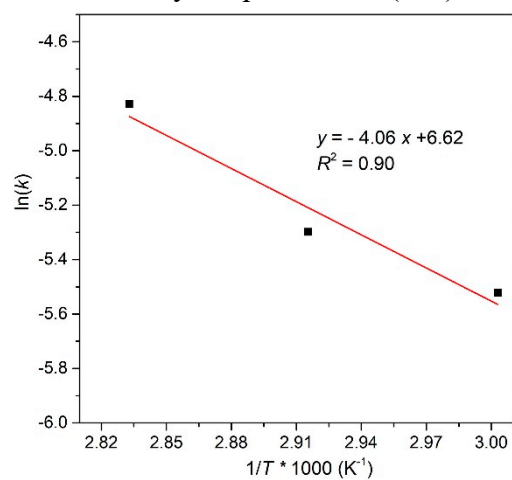

Figure S13. Arrhenius plots for the hydrogenation reaction of phenol.

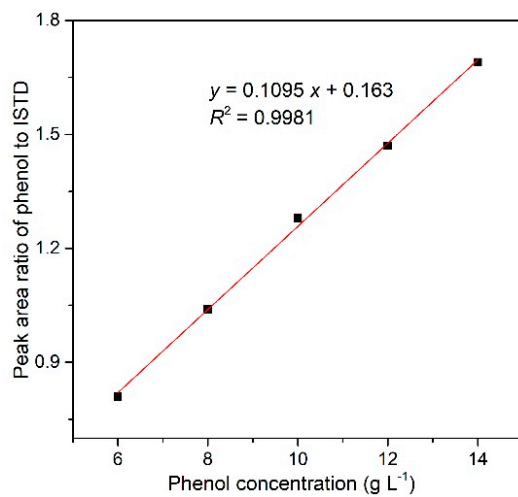

Figure S14. The standard curve for phenol conversion rate of 5–15%.



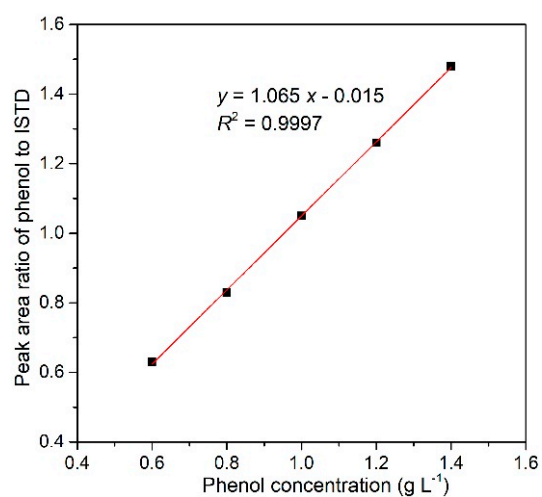

Figure S15. The standard curve for phenol conversion rate of 85–95%.
